# Supplementary material for: A multi-modal mass spectrometry approach for the detection and mapping of date rape drugs in fingermarks
Source: Royal Society of Chemistry journal article supplement (doi:10.1039/d5an00328h), 2025-01-01
Supplement: d5an00328h1.zip [file d5an00328h1.zip]

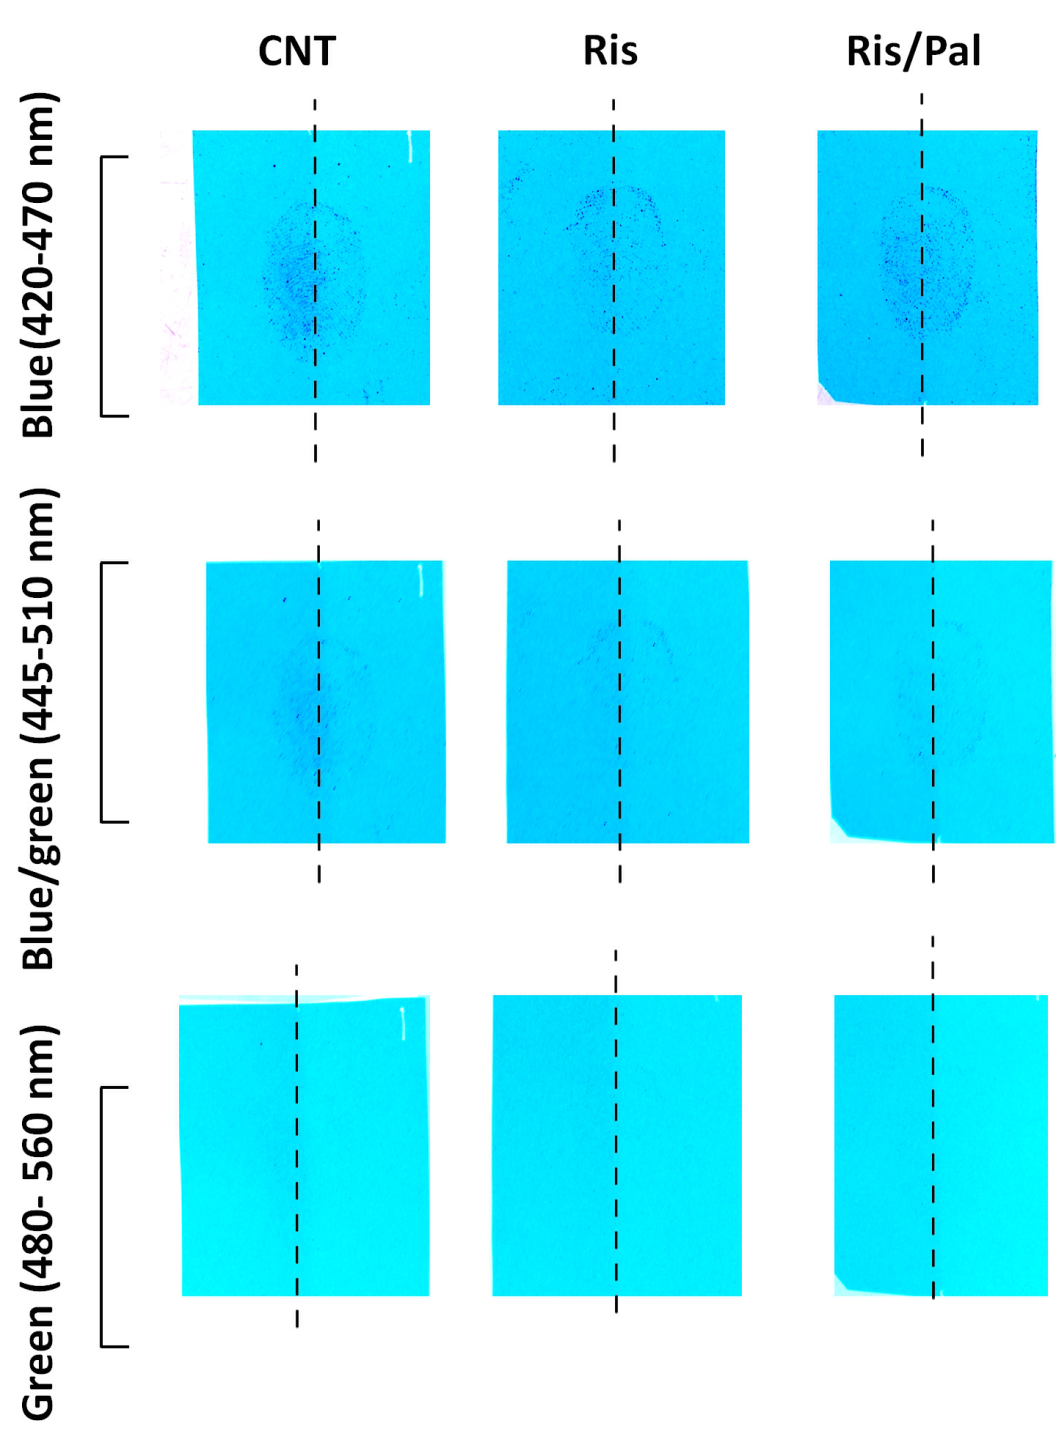


**Fig S3. DMAC enhancement of marks contaminated with risperidone/paliperidone (1:1) solution.** This figure is the re-processed image of Fig. 7A using Photoshop to improve contrast and enhance visibility of the fingermarks on red paper; specifically the original images were "inverted" thus leading to blue coloured fingermark on turquoise coloured substrate, and the contrast was increased. Risperidone/paliperidone-**c**ontaminated fingermark were deposited in triplicates on red paper, enhanced with DMAC and visualised under 3 wavelengths.
